# Supplementary material
Source: PubMed Central journal article supplement (PMC2000815)

Fig. S1

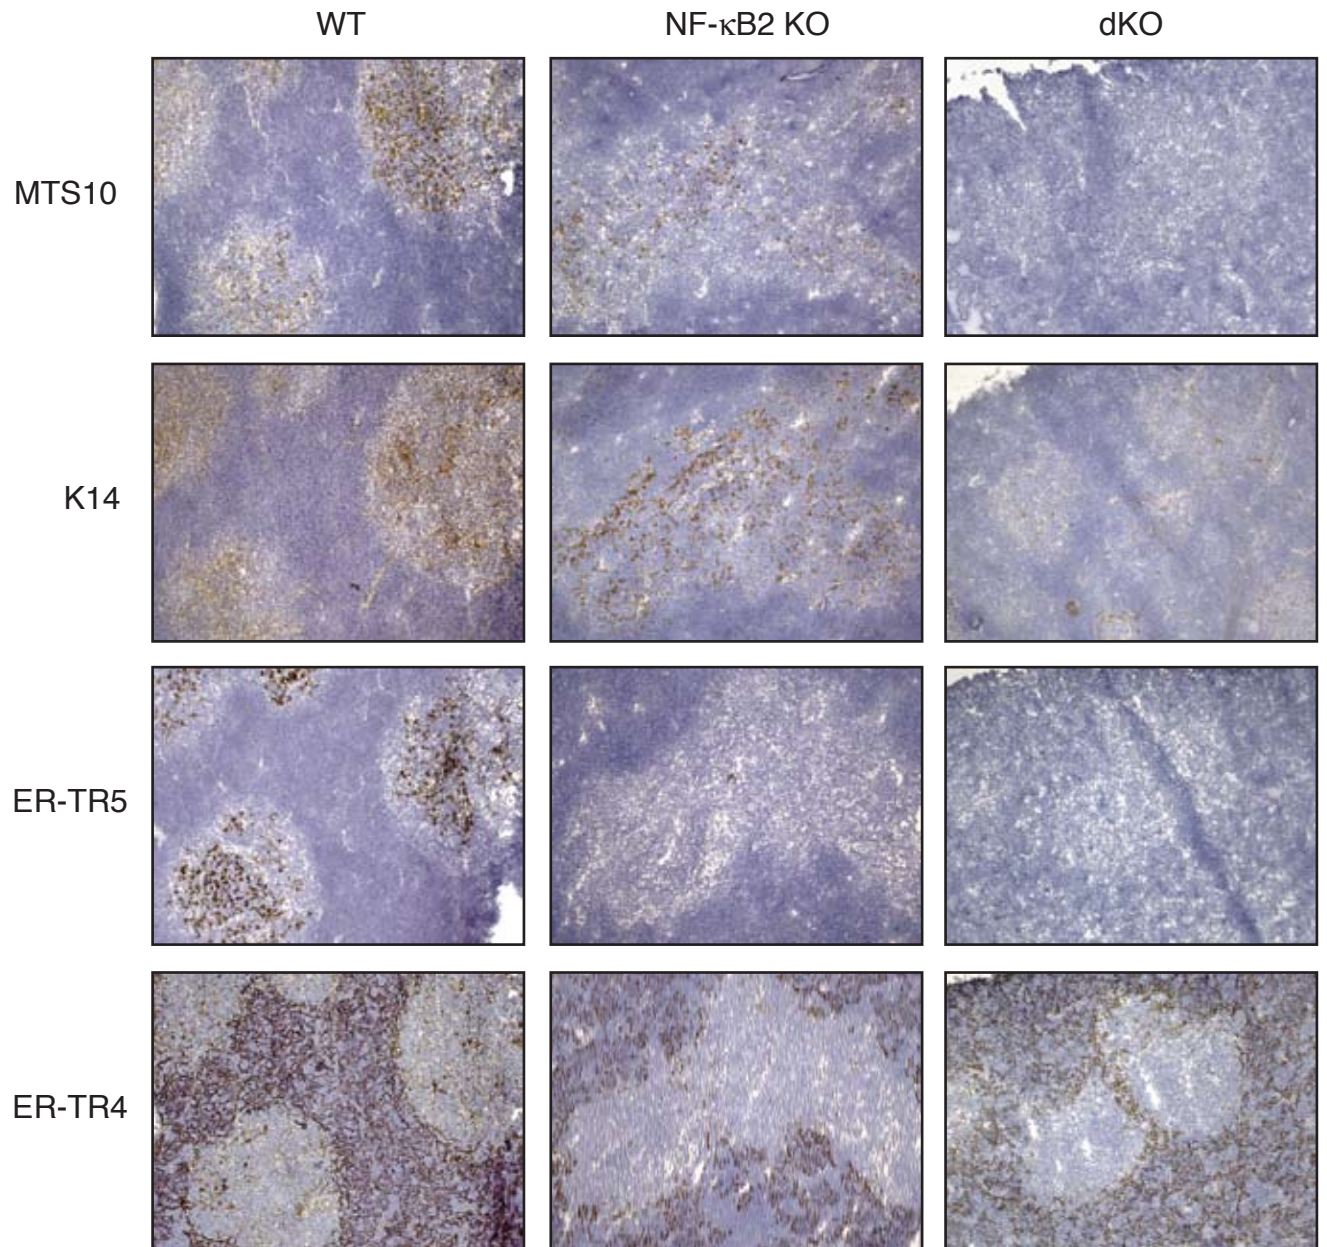

Supplement: NIHMS31087-supplement-01.pdf [file NIHMS31087-supplement-01.pdf]
